# Supplementary material
Source: publisher figshare collection journal article supplement (https://acs.figshare.com/ndownloader/files/31119501)
Supplement: Supplementary file 1 [file 31119501]

## Supporting Information

### Fabrication of a Double-Network Hydrogel Based on Carboxymethylated Curdlan/Polyacrylamide with Highly Mechanical Performance for Cartilage Repair

Pengguang Wang, Min Wu, Ruiqi Li, Zhixiang Cai\*, Hongbin Zhang\*

Advanced Rheology Institute, Department of Polymer Science and Engineering, School of Chemistry and Chemical Engineering, Frontiers Science Center for Transformative Molecules, Shanghai Key Laboratory of Electrical Insulation and Thermal Aging, Shanghai Jiao Tong University, Shanghai 200240, China

Corresponding Author:

Zhixiang Cai, sky-meteor@sjtu.edu.cn

Hongbin Zhang, hbzhang@sjtu.edu.cn

#### Results:

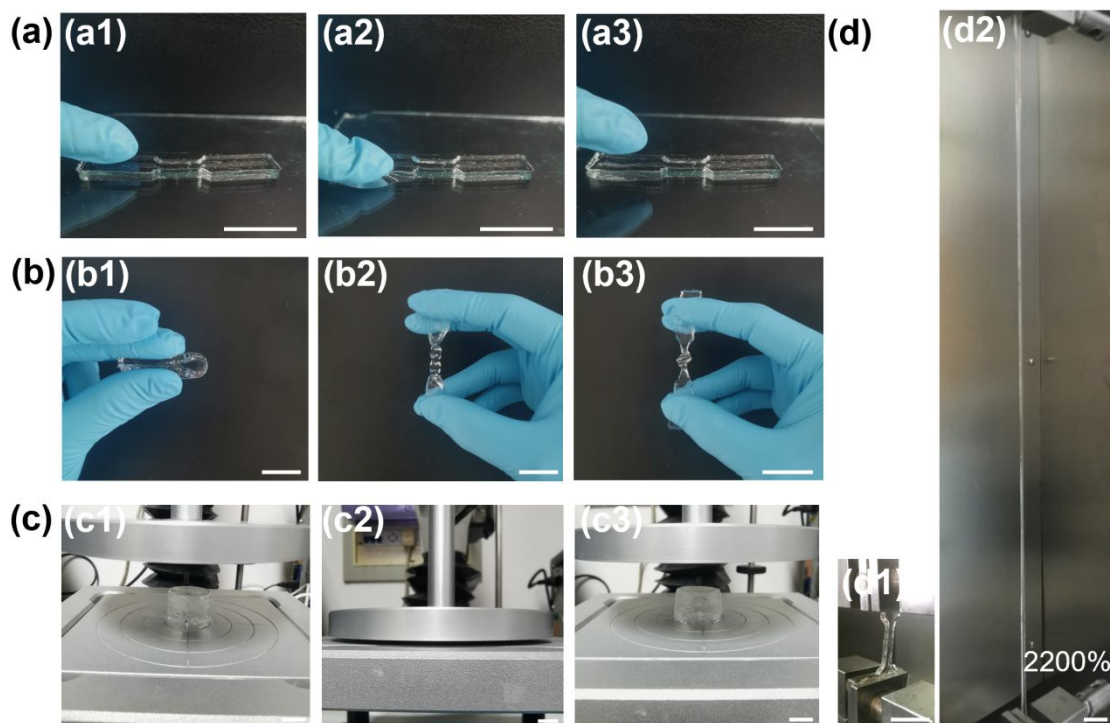

Figure S1 Visual images of the deformation and mechanical properties of PAAm SN hydrogel: (a1) original PAAm SN hydrogel with a dumbbell-shape; (a2) under compression; (a3) after compression; (b1) bending; (b2) twisting; (b3) knotting; (c1) original PAAm SN hydrogel with a cylinder-shape; (c2) at 95% compressive strain; (c3) recovery of the SN hydrogel; (d1) initial

state of the PAAm SN hydrogel with a dumbbell-shape; (d2) at 2200% tensile strain without break.

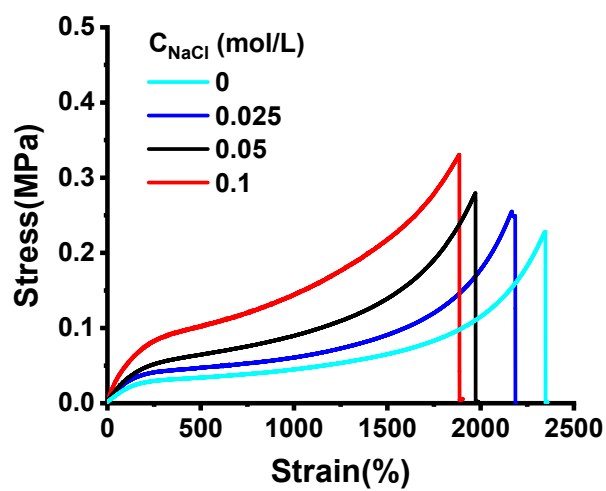

**Figure S2.** Tensile stress-strain curves of the CMCD/PAAm DN hydrogels at different initial concentrations of NaCl.
